# Supplementary material for: Long-Term Outcomes in Patients Undergoing Thoracic Endovascular Aortic Repair. Single Center Experience
Source: Preprints.org preprint supplement (doi:10.20944/preprints202308.1197.v1), 2023-08-16
Supplement: Supplementary file 1 [file supplementary]

**Supplemental Table 1: Emergent TEVAR Post-operative Outcomes.** RBC-red blood cells; FFP-fresh frozen plasma; ICU-intensive care unit; LOS-length of stay; TIA-transitory ischemic attack

| **Post-operative Outcomes** | **Patients n = 6** |
| --- | --- |
| Total ICU (Hours) (Median/IQR) | 75.2 (±89.8) |
| Total LOS (Days) (Median/IQR) | 8 (±6.8) |
| Blood Products Used n (%) | 4 (66.6%) |
| RBC Units n (%) | 4 (66.6%) |
| Cryoprecipitate Units n (%) | 0 |
| Platelet Units n (%) | 0 |
| FFP Units n (%) | 0 |
| Creatine level (Median/IQR) | 1.2 (0.7) |
| Creatinine Clearance (mean/SD) | 48.2 (±14.2) |
| Creatinine Clearance < 60 ml/min n (%) | 4 (66.6%) |
| Prolonged Ventilation >24 hours n (%) | 3 |
| Superficial Infection n (%) | 1 (16.6%) |
| Deep Sternal Infection n (%) | 0 |
| Cerebrovascular Accident n (%) | 1 (16.6%) |
| TIA n (%) | 0 |
| Cardiac Arrest n (%) | 0 |
| Renal Failure n (%) | 2 (33.3%) |
| Dialysis n (%) | 1 (16.6%) |
| New Atrial Fibrillation n (%) | 1 (16.6%) |
| ICU Readmission n (%) | 1 (16.6%) |
| Operative Mortality n (%) | 0 |
| In-hospital Mortality n (%) | 1 (16.6%) |
| Readmission n (%) | 3 (50%) |
| Cardiac Readmission n (%) | 2 (33.3%) |

**Supplemental Table 2: Emergent Cases Long-Term Outcomes.**

| **Long-term Outcomes** | **Patients n = 5** |
| --- | --- |
| **Survival (all cause)** |  |
| Yes n(%) | 4 (80%) |
| No n(%) | 1 (20%) |
| MACCE n(%) | 2 (40%) |
| Stroke n(%) | 0 |
| MI n(%) | 0 |
| Reoperation | 0 |
| Cardiac Death | 0 |
| Endoleak | 2 (40%) |

**Supplemental Table 3: Urgent TEVAR Post-operative Outcomes.** RBC-red blood cells; FFP-fresh frozen plasma; ICU-intensive care unit; LOS-length of stay; TIA-transitory ischemic attack

| **Post-operative Outcomes** | **Patients n = 37** |
| --- | --- |
| Total ICU (Hours) (Median/IQR) | 115.2 (± 139.8) |
| Total LOS (Days) (Median/IQR) | 11.8 (± 7) |
| Blood Products Used n (%) | 13 (35.1%) |
| RBC Units n (%) | 13 (35.1%) |
| Cryoprecipitate Units n (%) | 1 (2.7%) |
| Platelet Units n (%) | 1 (2.7%) |
| FFP Units n (%) | 1 (2.7%) |
| Creatine level (Median/IQR) | 1.1 (± 0.8) |
| Creatinine Clearance (mean/SD) | 67.5 (± 27.2) |
| Creatinine Clearance < 60 ml/min n (%) | 12 (32.4%) |
| Prolonged Ventilation >24 hours n (%) | 9 (24.3%) |
| Superficial Infection n (%) | 0 |
| Deep Sternal Infection n (%) | 1 (2.7%) |
| Cerebrovascular Accident n (%) | 1 (2.7%) |
| TIA n (%) | 0 |
| Cardiac Arrest n (%) | 3 (8.1%) |
| Renal Failure n (%) | 4 (10.8%) |
| Dialysis n (%) | 3 (8.1%) |
| New Atrial Fibrillation n (%) | 5 (13.5%) |
| ICU Readmission n (%) | 1 (2.7%) |
| Operative Mortality n (%) | 5 (13.5%) |
| In-hospital Mortality n (%) | 5 (13.5%) |
| Readmission n (%) | 23 (62.1%) |
| Cardiac Readmission n (%) | 11 (29.7%) |

**Supplemental Table 4: Urgent Cases Long-Term Outcomes**

| **Long-term Outcomes** | **Patients n = 32** |
| --- | --- |
| **Survival (all cause)** |  |
| Yes n (%) | 28 (87.5%) |
| No n (%) | 4 (12.5%) |
| MACCE n (%) | 13 (40%) |
| Stroke n (%) | 3 (9.3%) |
| MI n (%) | 2 (6.2%) |
| Reoperation n (%) | 6 (18.7%) |
| Cardiac Death n (%) | 4 (12.5%) |
| Endoleak n (%) | 8 (25%) |

**Supplemental Table 5: Post-operative Outcomes of Aortic Dissection.** RBC-red blood cells; FFP-fresh frozen plasma; ICU-intensive care unit; LOS-length of stay; TIA-transitory ischemic attack

| **Post-operative Outcomes** | **Patients n = 28** |
| --- | --- |
| Total ICU (Hours) (Median/IQR) | 114.2 (± 141.5) |
| Total LOS (Days) (Median/IQR) | 9.5 (± 8.4) |
| Blood Products Used n (%) | 10 (35.7%) |
| RBC Units n (%) | 8 (28.5%) |
| Cryoprecipitate Units n (%) | 1 (3.6%) |
| Platelet Units n (%) | 1 (3.6%) |
| FFP Units n (%) | 1 (3.6%) |
| Creatine level (Median/IQR) | 1.7 |
| Prolonged Ventilation >24 hours n (%) | 8 (28.6%) |
| Superficial Infection n (%) | 0 |
| Deep Sternal Infection n (%) | 1 (3.6%) |
| Cerebrovascular Accident n (%) | 2 (7.1%) |
| TIA n (%) | 0 |
| Cardiac Arrest n (%) | 0 |
| Renal Failure n (%) | 6 (21.4%) |
| Dialysis n (%) | 4 (14.3%) |
| New Atrial Fibrillation n (%) | 3 (10.7%) |
| ICU Readmission n (%) | 1 (3.6%) |
| Operative Mortality n (%) | 2 (7.1%) |
| In-hospital Mortality n (%) | 2 (7.1%) |
| Readmission n (%) | 16 (57.1%) |
| Cardiac Readmission n (%) | 7 (25%) |

**Supplemental Table 6: Aortic Dissection Long-Term Outcomes**

| **Long-term Outcomes** | **Patients n = 26** |
| --- | --- |
| **Survival (all cause)** |  |
| Yes n (%) | 21 (80.7%) |
| No n (%) | 5 (19.3%) |
| MACCE n (%) | 5 (19.3%) |
| Stroke n (%) | 1 (3.8%) |
| MI n (%) | 0 |
| Reoperation n (%) | 1 (3.8%) |
| Cardiac Death n (%) | 1 (3.8%) |
| Endoleak n (%) | 4 (15.4%) |

**Supplemental Table 7: Post-operative Outcomes of Aortic Aneurysm.** RBC-red blood cells; FFP-fresh frozen plasma; ICU-intensive care unit; LOS-length of stay; TIA-transitory ischemic attack

| **Post-operative Outcomes** | **Patients n = 60** |
| --- | --- |
| Total ICU (Hours) (Median/IQR) | 79.5 (± 110.2) |
| Total LOS (Days) (Median/IQR) | 7.2 (± 5.7) |
| Blood Products Used n (%) | 17 (28.3%) |
| RBC Units n (%) | 16 (26.7%) |
| Cryoprecipitate Units n (%) | 1 (1.7%) |
| Platelet Units n (%) | 6 (10%) |
| FFP Units n (%) | 4 (6.7%) |
| Creatine level (Median/IQR) | 0.7 (± 0.5) |
| Prolonged Ventilation >24 hours n (%) | 8 (13.3%) |
| Superficial Infection n (%) | 1 (1.7%) |
| Deep Sternal Infection n (%) | 0 |
| Cerebrovascular Accident n (%) | 1 (1.7%) |
| TIA n (%) | 0 |
| Cardiac Arrest n (%) | 4 (6.7%) |
| Renal Failure n (%) | 3 (5%) |
| Dialysis n (%) | 2 (3.3%) |
| New Atrial Fibrillation n (%) | 9 (15%) |
| ICU Readmission n (%) | 3 (5%) |
| Operative Mortality n (%) | 4 (6.7%) |
| In-hospital Mortality n (%) | 5 (8.3%) |
| Readmission n (%) | 36 (60%) |
| Cardiac Readmission n (%) | 16 (26.7%) |

**Supplemental Table 8: Long-term Outcomes of Aortic Aneurysm**

| **Long-term Outcomes** | **Patients n = 55** |
| --- | --- |
| **Survival (all cause)** |  |
| Yes n (%) | 45 (81.8%) |
| No n (%) | 10 (18.2%) |
| MACCE n (%) | 12 (21.8%) |
| Stroke n (%) | 5 (9.1%) |
| MI n (%) | 2 (3.6%) |
| Reoperation n (%) | 7 (12.7%) |
| Cardiac Death n (%) | 1 (1.8%) |
| Endoleak n (%) | 12 (21.8%) |
